# Supplementary material
Source: HighWire-hosted journal article supplement (https://jnm.snmjournals.org/highwire/filestream/94424/field_highwire_adjunct_files/0/107359_Supplemental_Data.pdf)
Supplement: 107359_Supplemental_Data.pdf [file 107359_Supplemental_Data.pdf]

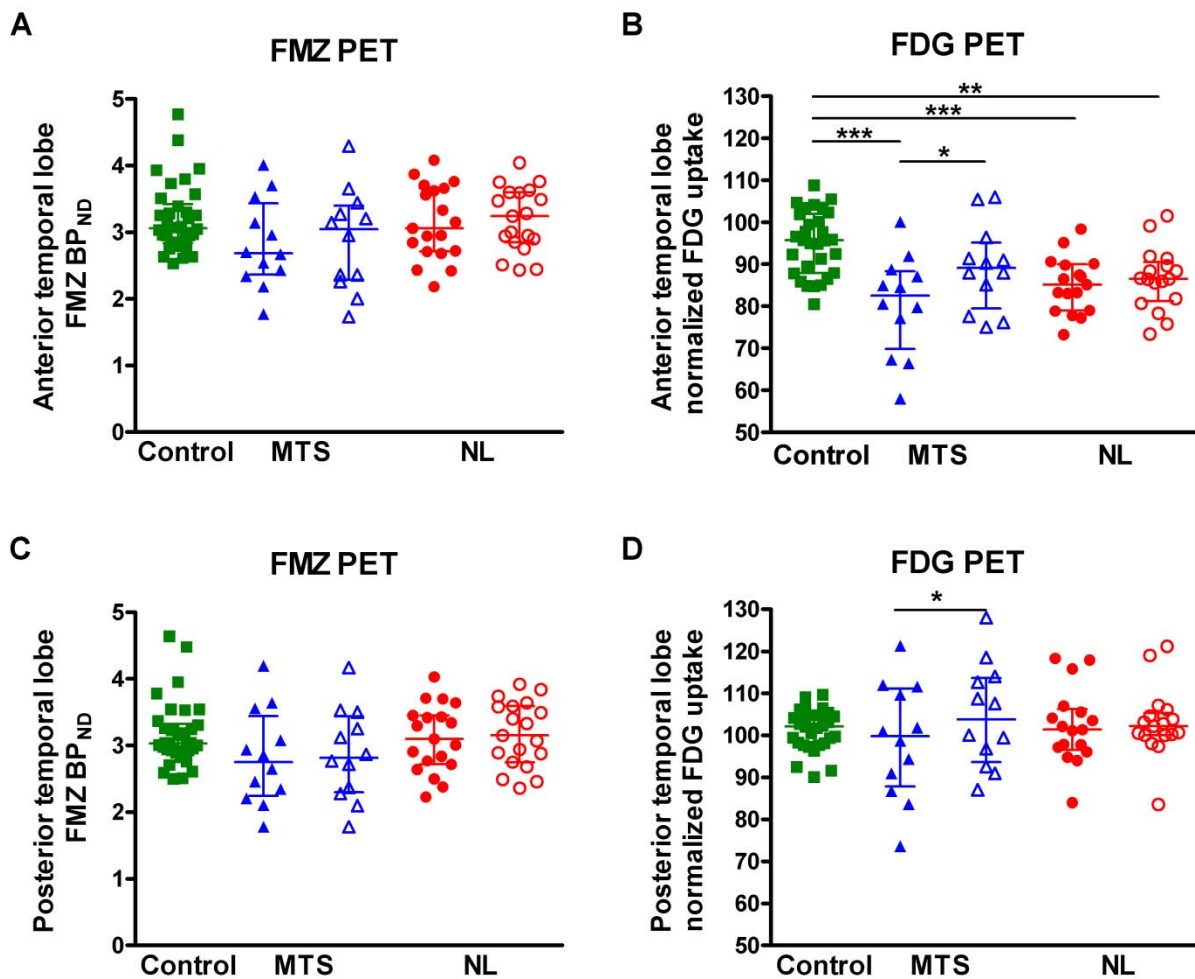

SUPPLEMENTAL FIGURE 1 Results of ROI quantification for the anterior temporal pole ROI for: (A) [<sup>18</sup>F]-FMZ BP<sub>ND</sub> and (B) normalised FDG-PET intensity. Results of ROI quantification for the posterior temporal pole ROI for: (C) [<sup>18</sup>F]-FMZ BP<sub>ND</sub> and (D) normalised FDG-PET intensity. Legend as in Figure 2. \* p<0.05 \*\*p<0.01 \*\*\*p<0.001, Mann Whitney U test.

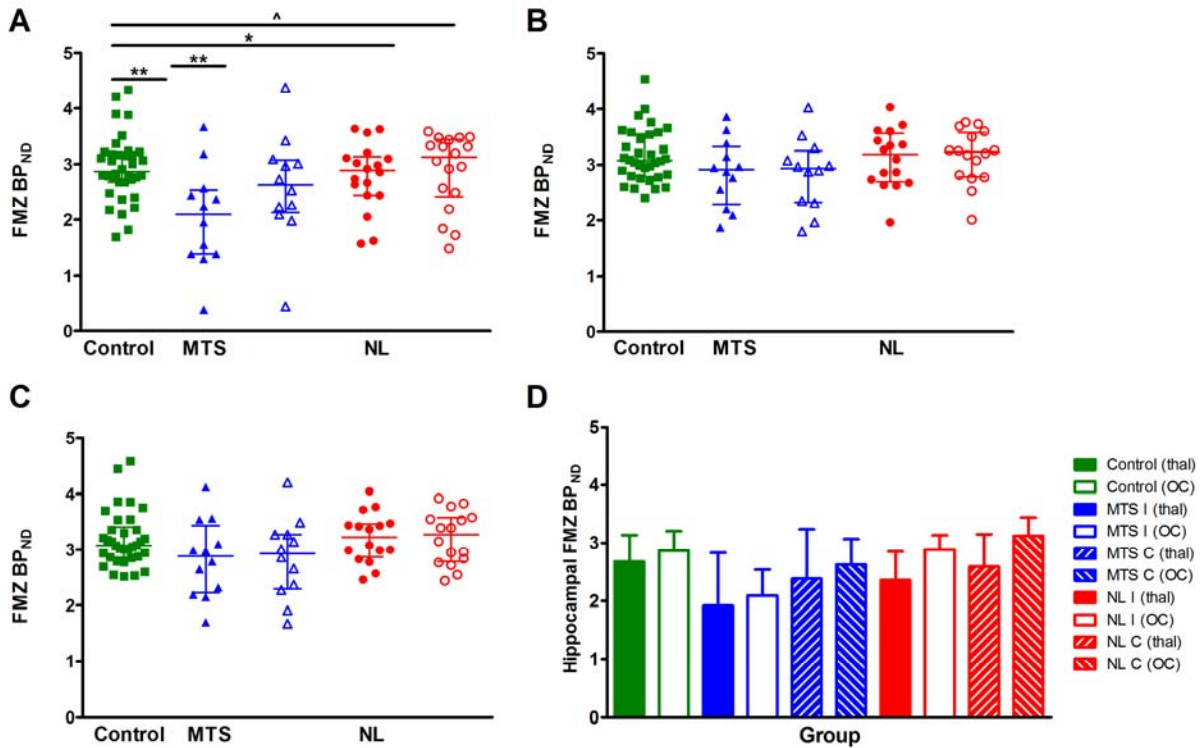

SUPPLEMENTAL FIGURE 2 [<sup>18</sup>F]-FMZ BP<sub>ND</sub> in the hippocampi (A) and anterior (B) and posterior temporal lobes (C) of patients and controls using the occipital cortex as the receptor-rich reference region. (D) Shows the median hippocampal [<sup>18</sup>F]-FMZ BP<sub>ND</sub> values derived from the two reference regions, showing no significant difference between the values obtained using the thalamus (thal) and the occipital cortex (OC). Legend as in Figure 2. . ^ p<0.10, \* p<0.05 \*\*p<0.01, Mann Whitney U test.

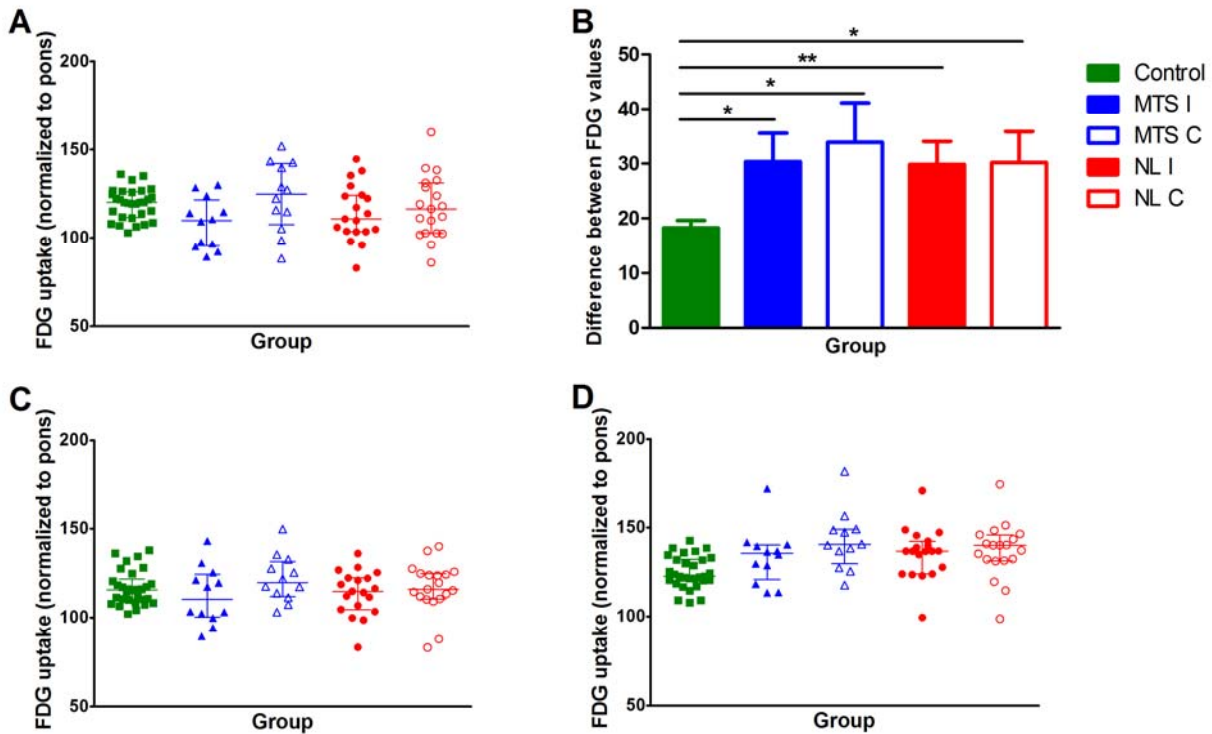

SUPPLEMENTAL FIGURE 3 FDG uptake values in the hippocampi (A) and anterior (C) and posterior temporal lobes (D) of patients and controls using the pons for normalisation of uptake. No differences were observed between patients and controls in any region, although asymmetry was maintained between the ipsilateral and contralateral hemispheres in patients. (B) Shows the relative increase in FDG uptake units in the different groups (comparing normalisation using the cerebellum and the pons), showing a vastly greater increase in FDG uptake in patients when compared to controls, accounting for the loss of significant difference seen between the patients and controls. \*  $p < 0.05$  \*\* $p < 0.01$ , Mann Whitney U test.

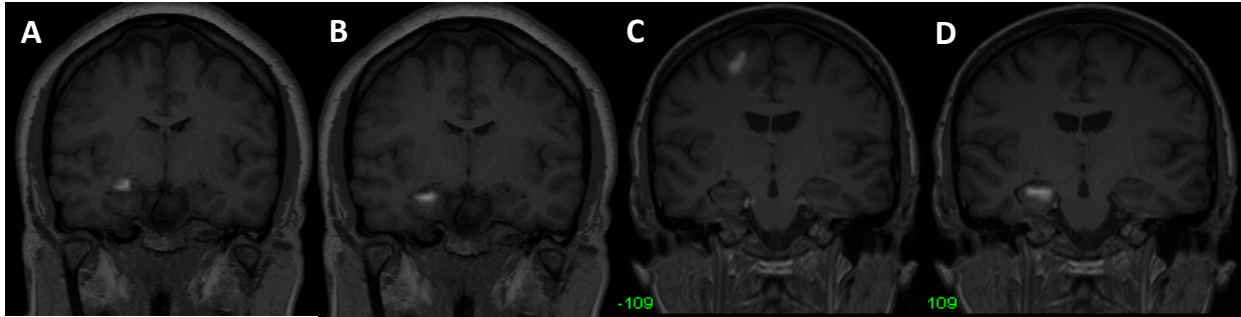

SUPPLEMENTAL FIGURE 4 Localisation of the epileptogenic zone by SPM analysis. (A) Shows a localising cluster in the hippocampus on FDG and (B) [ $^{18}\text{F}$ ]-FMZ  $\text{BP}_{\text{ND}}$  images in a patient with right MTS. (C) Shows SPM analysis of the FDG image of a patient with right NL TLE with no significant clusters found in the temporal lobe, but SPM analysis of the [ $^{18}\text{F}$ ]-FMZ  $\text{BP}_{\text{ND}}$  image (D) showed a significant cluster identified in the right hippocampus.
